# Supplementary material
Source: Springer Nature journal article supplement (https://www.springermedizin.de/resource/supplementary/12885_2013_4487_MOESM3_ESM.pdf/9466474)

**A****ER+**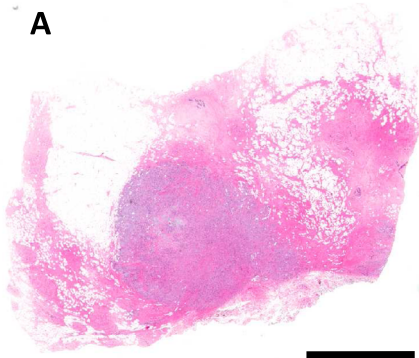**B**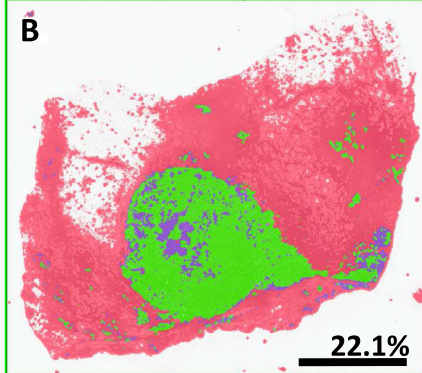**C****ER-**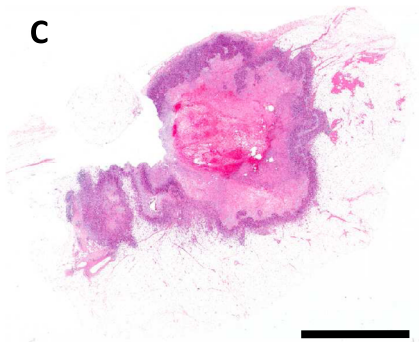**D**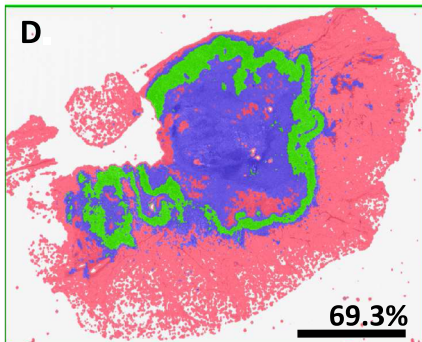

Supplement: MOESM3 [file 9466474]
